# Supplementary material for: A comprehensive genomic meta-analysis identifies confirmatory role of OBSCN gene in breast tumorigenesis
Source: PubMed Central journal article supplement (PMC5731952; doi:10.18632/oncotarget.20404), 2017-08-23
Supplement: oncotarget-08-102263-s001.pdf [file oncotarget-08-102263-s001.pdf]

# A comprehensive genomic meta-analysis identifies confirmatory role of *OBSCN* gene in breast tumorigenesis

## SUPPLEMENTARY MATERIALS

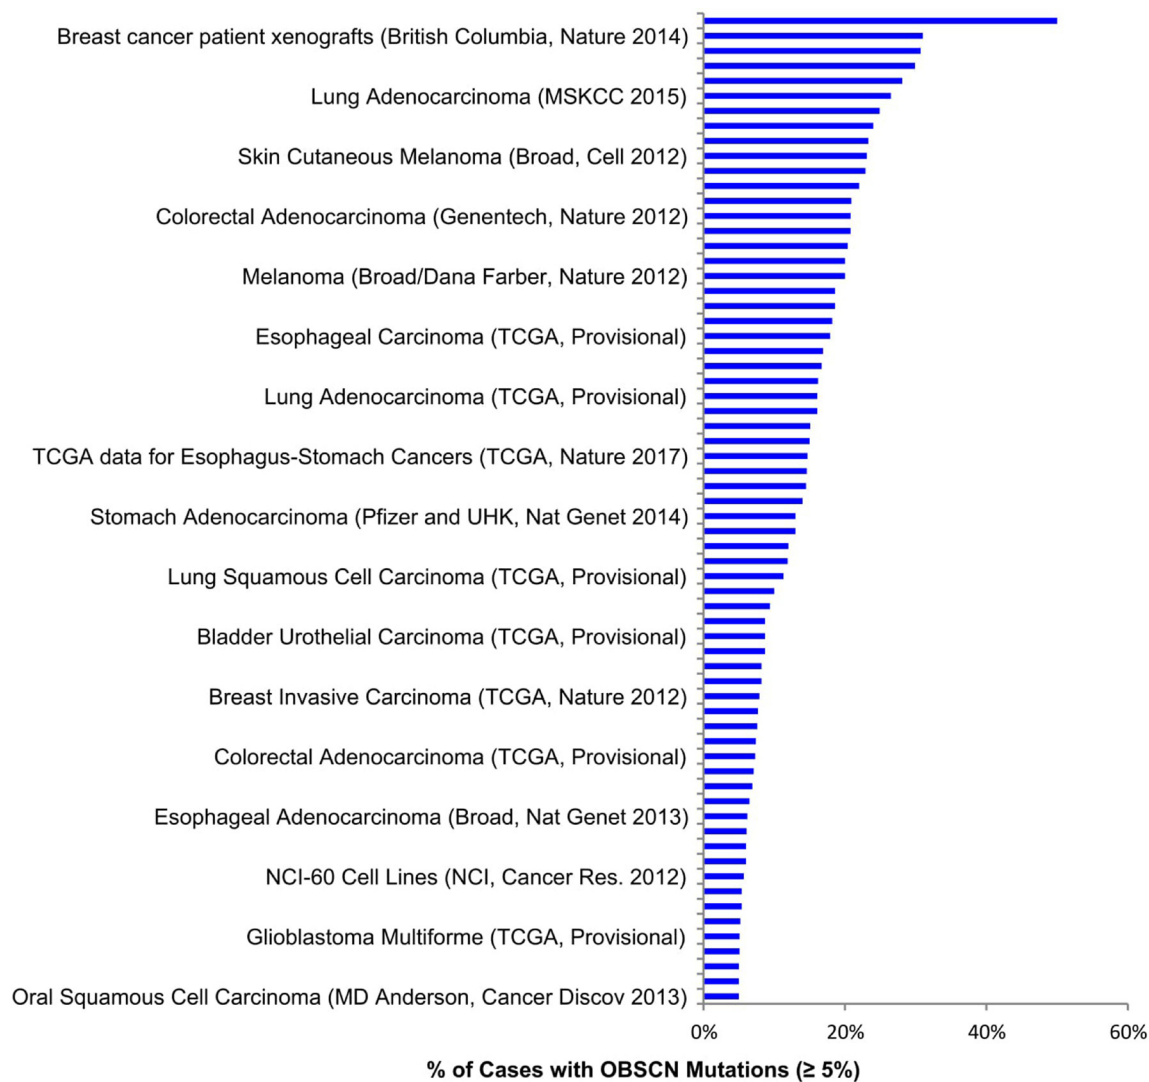

Supplementary Figure 1: Percentage of cases with *OBSCN* gene mutations over various cancer types (> 5%).

Supplementary Table 1: Protein variants of *OBSCN* gene predicted using SIFT and POLYPHEN-2 with reference SNP (rs-id) identifier, gene and protein variants information with SIFT and Polyphen-2 scores. See Supplementary\_Table\_1
